# Supplementary material
Source: PubMed Central journal article supplement (PMC3933631)

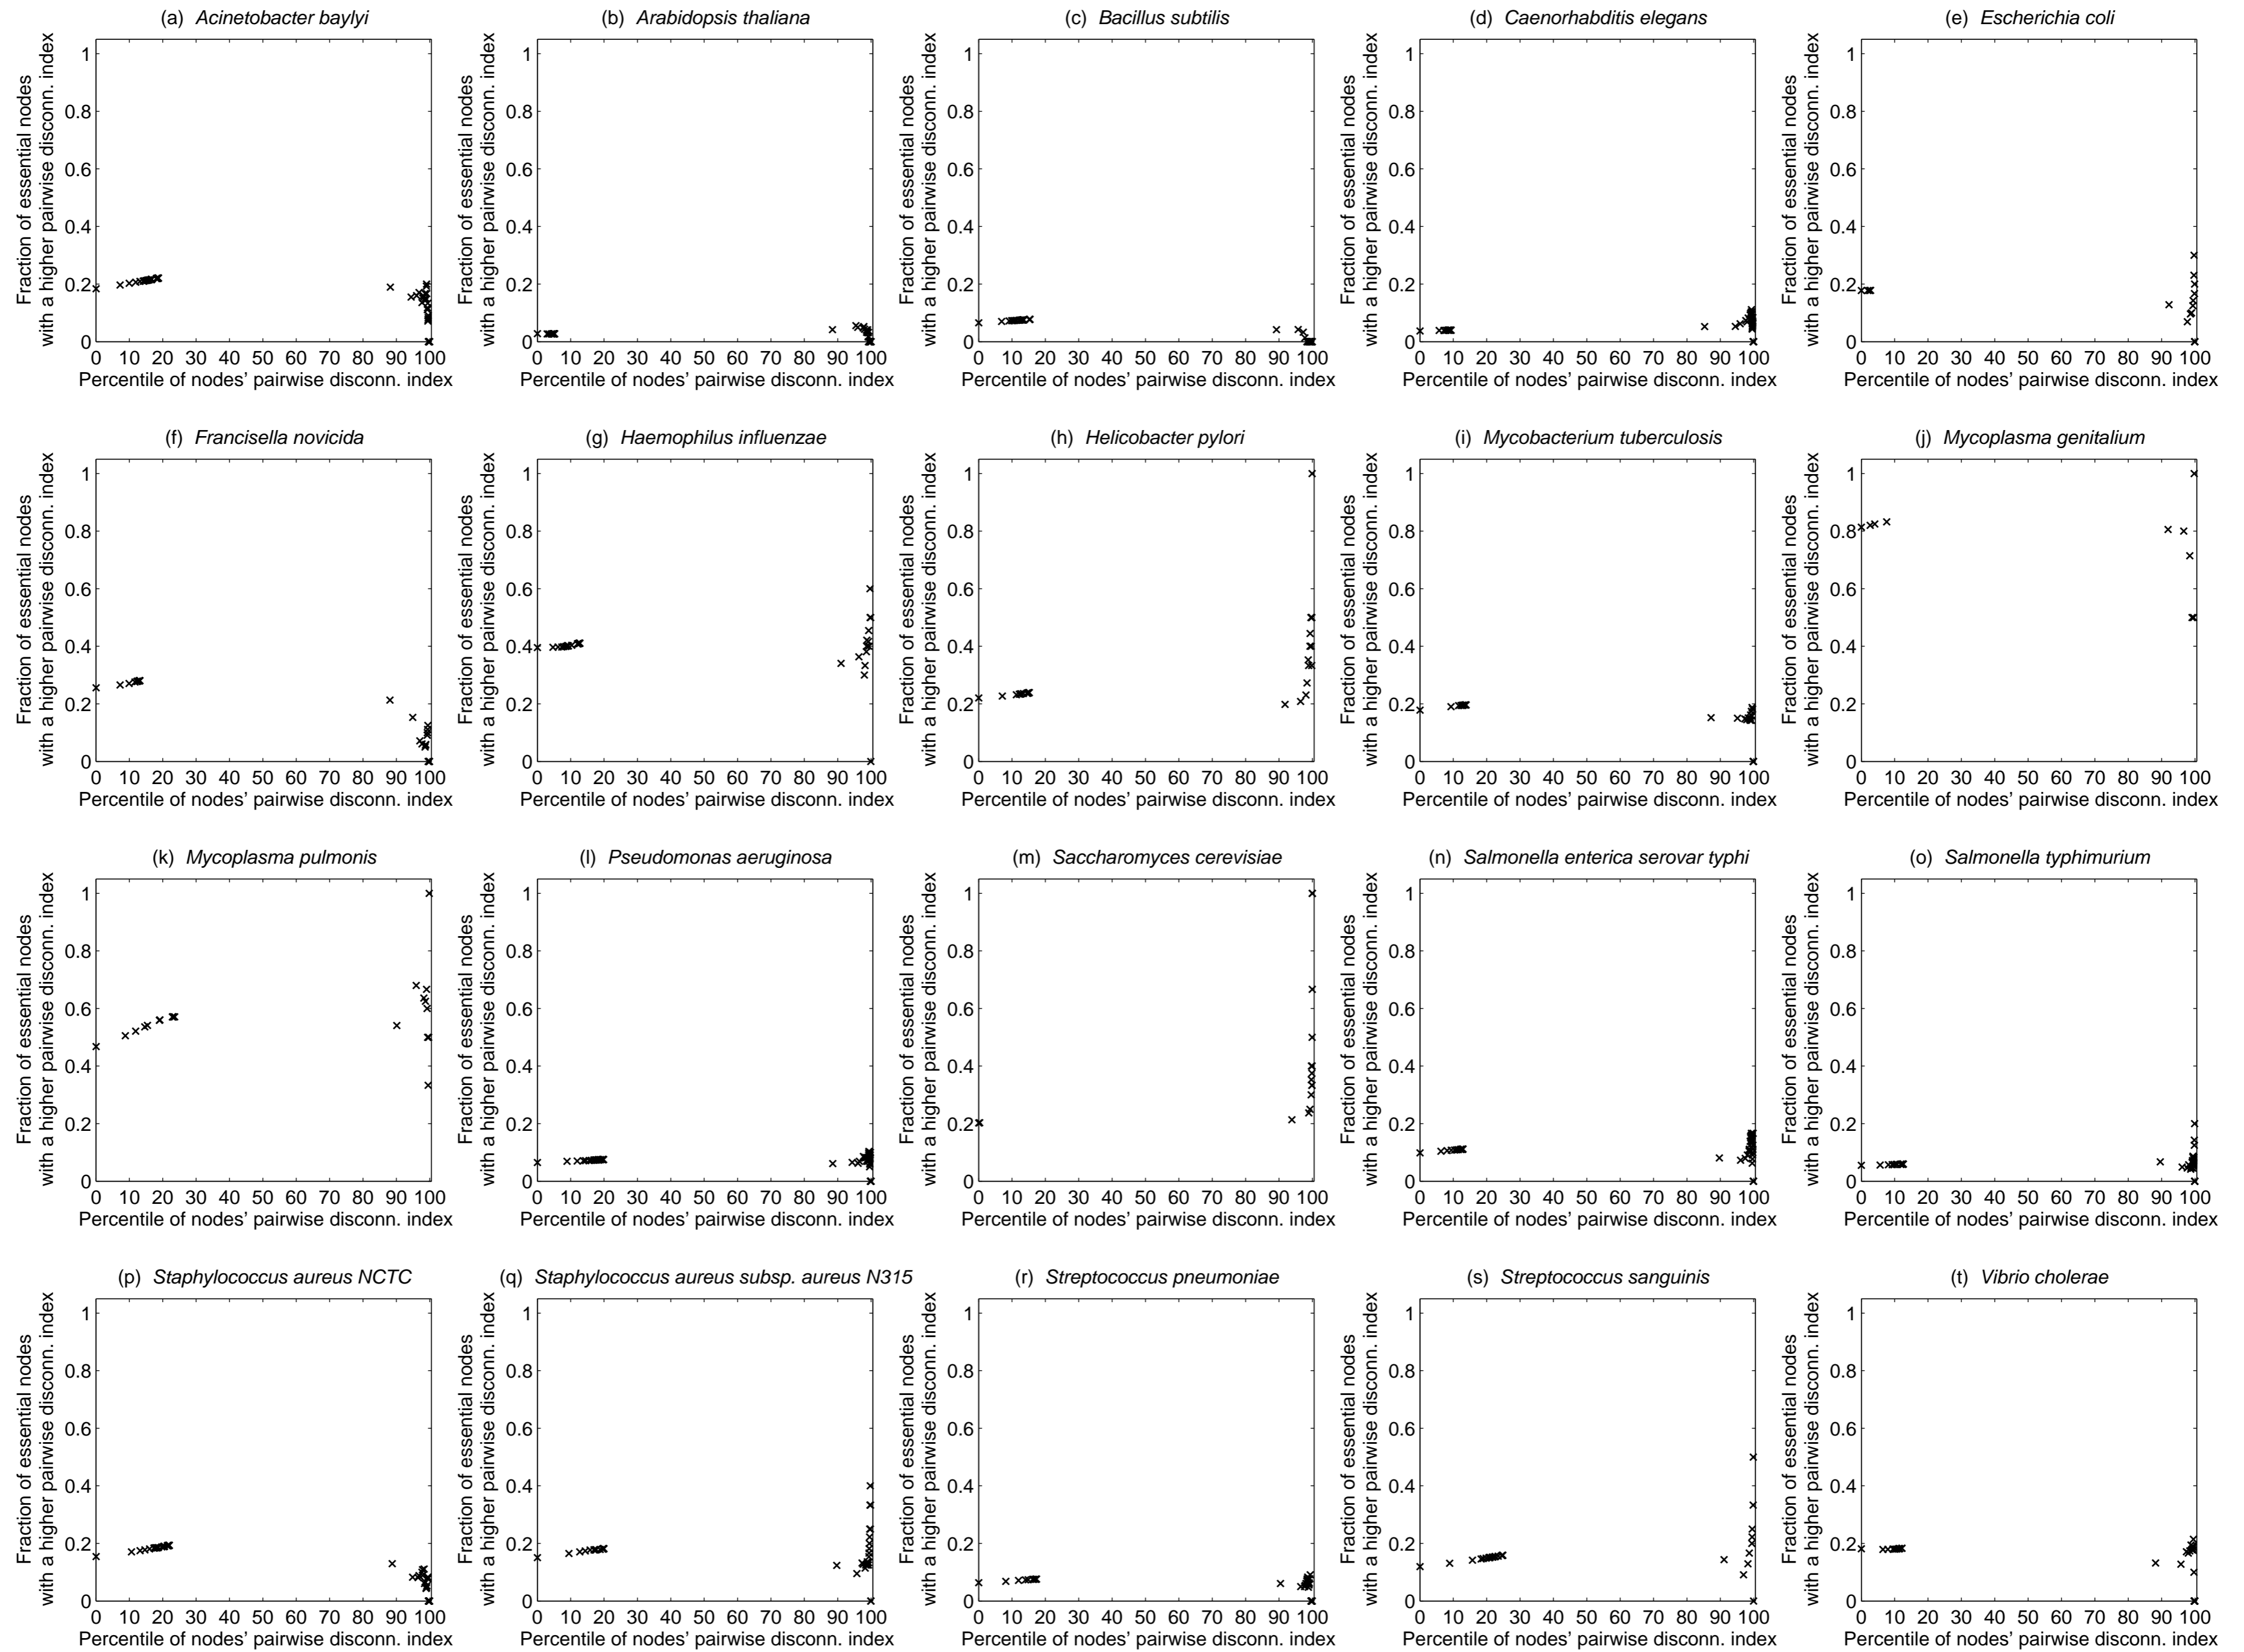

Supplement: 11693_2013_9123_MOESM4_ESM.pdf [file 11693_2013_9123_MOESM4_ESM.pdf]
